# Supplementary material
Source: Research Square preprint supplement (doi:10.21203/rs.3.rs-9083929/v1)
Supplement: Supplementary file 1 [file 5ac932b4254f52f2465a80c4.docx]

| **Model** | **Hyperparameter** | **Grid / Values** |
| --- | --- | --- |
| **Elastic Net (EN)** | Regularization strength (α) | 60 log-spaced values from (10-5) to (100) |
|  | Mixing parameter (l1_ratio) | {0.1, 0.5, 0.9} |
| **Random Forest (RF)** | Number of trees (n_estimators) | {100, 200, 400, 800} |
|  | Maximum tree depth (max_depth) | {4, 6, 8, 10, 15, 20, None} |
|  | Minimum samples per leaf (min_samples_leaf) | {1, 2, 4, 6, 8} |
