# Supplementary material
Source: Research Square preprint supplement (doi:10.21203/rs.3.rs-9083929/v1)
Supplement: Supplementary file 2 [file 6a40d38c70400e482b904c13.docx]

| **Feature** | **Observations per participant, mean ± SD** | **Values per participant, mean ± SD** | **Average missing (%)** |
| --- | --- | --- | --- |
| wake MVPA power law distribution_day | 235.87 ± 94.35 | 3.30 ± 2.71 | 28.53 |
| wake MVPA power law distribution_night | 250.20 ± 95.16 | 5.43 ± 4.51 | 24.18 |
| wake SLPA power law distribution_day | 235.87 ± 94.35 | 142.82 ± 354.20 | 28.53 |
| wake SLPA power law distribution_night | 250.20 ± 95.16 | 244.76 ± 609.02 | 24.18 |
| wake sed power law distribution_day | 235.87 ± 94.35 | 9.02 ± 11.90 | 28.53 |
| wake sed power law distribution_night | 250.20 ± 95.16 | 15.51 ± 20.41 | 24.18 |
| steps_sum_rq1_day | 272.67 ± 102.97 | 4.00e+03 ± 1.71e+03 | 17.37 |
| steps_sum_rq1_night | 267.93 ± 103.08 | 736.18 ± 301.49 | 18.81 |
| total_activity_min_day | 235.87 ± 94.35 | 197.48 ± 77.06 | 28.53 |
| total_activity_min_night | 250.20 ± 95.16 | 349.69 ± 143.78 | 24.18 |
| wake duration equal avg duration [min]_day | 235.87 ± 94.35 | 9.38 ± 2.63 | 28.53 |
| wake duration equal avg duration [min]_night | 250.20 ± 95.16 | 16.14 ± 3.63 | 24.18 |
| wake light 60s epoch [min]_day | 235.87 ± 94.35 | 122.74 ± 43.01 | 28.53 |
| wake light 60s epoch [min]_night | 250.20 ± 95.16 | 216.63 ± 80.74 | 24.18 |
| wake mod 60s epoch [min]_day | 235.87 ± 94.35 | 68.39 ± 34.26 | 28.53 |
| wake mod 60s epoch [min]_night | 250.20 ± 95.16 | 121.91 ± 63.04 | 24.18 |
| wake vig 60s epoch [min]_day | 235.87 ± 94.35 | 6.35 ± 3.41 | 28.53 |
| wake vig 60s epoch [min]_night | 250.20 ± 95.16 | 11.15 ± 6.33 | 24.18 |
| wake 60min power spectral sum_day | 181.60 ± 83.86 | 1.00 ± 4.60e-16 | 44.97 |
| wake 60min power spectral sum_night | 223.47 ± 89.46 | 1.48 ± 0.18 | 32.28 |
| wake 60min sample entropy_day | 235.87 ± 94.35 | 1.10e-04 ± 1.56e-04 | 28.53 |
| wake 60min sample entropy_night | 250.20 ± 95.16 | 2.03e-04 ± 3.00e-04 | 24.18 |
| wake 60min signal entropy_day | 235.87 ± 94.35 | -0.06 ± 0.17 | 28.53 |
| wake 60min signal entropy_night | 250.20 ± 95.16 | -0.11 ± 0.29 | 24.18 |
| wake dfa activity balance index_day | 235.87 ± 94.35 | 0.55 ± 0.05 | 28.53 |
| wake dfa activity balance index_night | 250.20 ± 95.16 | 0.96 ± 0.11 | 24.18 |
| wake dfa alpha_day | 235.87 ± 94.35 | 1.02 ± 0.03 | 28.53 |
| wake dfa alpha_night | 250.20 ± 95.16 | 1.77 ± 0.13 | 24.18 |
| wake ig r-squared_day | 235.27 ± 94.42 | 0.85 ± 0.03 | 28.71 |
| wake ig r-squared_night | 250.13 ± 95.15 | 1.48 ± 0.08 | 24.2 |
| wake intensity gradient_day | 235.27 ± 94.42 | -2.01 ± 0.21 | 28.71 |
| wake intensity gradient_night | 250.13 ± 95.15 | -3.49 ± 0.37 | 24.2 |
| MNAR_ACR_diurnal_one_sided_day | 266.13 ± 98.35 | 0.04 ± 0.03 | 19.35 |
| MNAR_CALLS_diurnal_one_sided_day | 299.67 ± 106.37 | 0.38 ± 0.13 | 9.19 |
| MNAR_CALLS_zero_day_flag | 299.67 ± 106.37 | 0.54 ± 0.19 | 9.19 |
| MNAR_CALLS_zero_streak_len | 299.67 ± 106.37 | 1.91 ± 1.25 | 9.19 |
| MNAR_COM_TRAFFIC_diurnal_one_sided_day | 297.67 ± 94.52 | 0.36 ± 0.15 | 9.8 |
| MNAR_COM_TRAFFIC_zero_day_flag | 297.67 ± 94.52 | 0.47 ± 0.27 | 9.8 |
| MNAR_COM_TRAFFIC_zero_streak_len | 297.67 ± 94.52 | 2.66 ± 5.23 | 9.8 |
| MNAR_COM_USAGE_diurnal_one_sided_day | 302.60 ± 100.87 | 0.24 ± 0.10 | 8.3 |
| MNAR_COM_USAGE_zero_day_flag | 302.60 ± 100.87 | 0.73 ± 0.11 | 8.3 |
| MNAR_COM_USAGE_zero_streak_len | 302.60 ± 100.87 | 6.01 ± 4.14 | 8.3 |
| MNAR_DIALOG_zero_day_flag | 222.27 ± 116.33 | 9.49e-04 ± 2.03e-03 | 32.65 |
| MNAR_DIALOG_zero_streak_len | 222.27 ± 116.33 | 1.29e-03 ± 3.00e-03 | 32.65 |
| MNAR_HRV_diurnal_one_sided_day | 271.13 ± 104.96 | 0.09 ± 0.08 | 17.84 |
| MNAR_HRV_low_cov_day_flag | 271.13 ± 104.96 | 0.96 ± 0.05 | 17.84 |
| MNAR_HRV_total10h_flag | 271.13 ± 104.96 | 0.79 ± 0.23 | 17.84 |
| MNAR_HRV_zero_day_flag | 271.13 ± 104.96 | 0.01 ± 0.01 | 17.84 |
| MNAR_HRV_zero_streak_len | 271.13 ± 104.96 | 0.03 ± 0.03 | 17.84 |
| MNAR_SLEEP_diurnal_one_sided_night | 239.00 ± 118.13 | 0.29 ± 0.16 | 27.58 |
| MNAR_SLEEP_low_cov_day_flag | 239.00 ± 118.13 | 0.60 ± 0.19 | 27.58 |
| MNAR_SLEEP_zero_day_flag | 239.00 ± 118.13 | 0.14 ± 0.14 | 27.58 |
| MNAR_SLEEP_zero_streak_len | 239.00 ± 118.13 | 0.96 ± 1.64 | 27.58 |
| MNAR_SM_TRAFFIC_diurnal_one_sided_day | 259.60 ± 128.44 | 0.29 ± 0.10 | 21.33 |
| MNAR_SM_TRAFFIC_zero_day_flag | 259.60 ± 128.44 | 0.65 ± 0.14 | 21.33 |
| MNAR_SM_TRAFFIC_zero_streak_len | 259.60 ± 128.44 | 5.68 ± 10.06 | 21.33 |
| MNAR_SM_USAGE_diurnal_one_sided_day | 301.73 ± 100.54 | 0.17 ± 0.16 | 8.57 |
| MNAR_SM_USAGE_zero_day_flag | 301.73 ± 100.54 | 0.80 ± 0.20 | 8.57 |
| MNAR_SM_USAGE_zero_streak_len | 301.73 ± 100.54 | 29.44 ± 51.40 | 8.57 |
| total_com_rx_day | 292.67 ± 93.83 | 9.29e+07 ± 1.00e+08 | 11.31 |
| total_com_rx_night | 295.93 ± 94.33 | 1.12e+08 ± 3.09e+08 | 10.32 |
| total_com_tx_day | 292.67 ± 93.83 | 1.19e+07 ± 9.07e+06 | 11.31 |
| total_com_tx_night | 295.93 ± 94.33 | 7.15e+06 ± 7.82e+06 | 10.32 |
| total_sm_rx_day | 250.93 ± 126.84 | 2.30e+08 ± 3.33e+08 | 23.96 |
| total_sm_rx_night | 239.27 ± 124.16 | 2.22e+08 ± 4.13e+08 | 27.49 |
| total_sm_tx_day | 250.93 ± 126.84 | 4.74e+06 ± 5.89e+06 | 23.96 |
| total_sm_tx_night | 239.27 ± 124.16 | 3.62e+06 ± 5.15e+06 | 27.49 |
| total_com_app_usage_day_h | 302.60 ± 100.87 | 0.51 ± 0.29 | 8.3 |
| total_com_app_usage_night_h | 302.60 ± 100.87 | 0.95 ± 0.42 | 8.3 |
| total_sm_app_usage_day_h | 301.73 ± 100.54 | 0.33 ± 0.43 | 8.57 |
| total_sm_app_usage_night_h | 301.73 ± 100.54 | 0.82 ± 1.06 | 8.57 |
| F0semitoneFrom27.5Hz_sma3nz_amean | 222.27 ± 116.33 | 29.21 ± 4.66 | 32.65 |
| F0semitoneFrom27.5Hz_sma3nz_stddevNorm | 222.27 ± 116.33 | 0.14 ± 0.04 | 32.65 |
| jitterLocal_sma3nz_amean | 222.27 ± 116.33 | 0.02 ± 3.45e-03 | 32.65 |
| loudness_sma3_amean | 222.27 ± 116.33 | 0.31 ± 0.08 | 32.65 |
| loudness_sma3_stddevNorm | 222.27 ± 116.33 | 0.76 ± 0.13 | 32.65 |
| mfcc1V_sma3nz_amean | 222.27 ± 116.33 | 34.12 ± 3.83 | 32.65 |
| mfcc2V_sma3nz_amean | 222.27 ± 116.33 | 14.37 ± 4.24 | 32.65 |
| mfcc3V_sma3nz_amean | 222.27 ± 116.33 | 12.50 ± 5.35 | 32.65 |
| mfcc4V_sma3nz_amean | 222.27 ± 116.33 | 0.10 ± 6.31 | 32.65 |
| shimmerLocaldB_sma3nz_amean | 222.27 ± 116.33 | 1.17 ± 0.14 | 32.65 |
| nbr_missed_calls_day | 299.67 ± 106.37 | 0.33 ± 0.32 | 9.19 |
| nbr_missed_calls_night | 299.67 ± 106.37 | 0.06 ± 0.07 | 9.19 |
| number_of_contacts_day | 299.67 ± 106.37 | 1.34 ± 1.95 | 9.19 |
| number_of_contacts_night | 299.67 ± 106.37 | 0.25 ± 0.30 | 9.19 |
| total_calling_frequency_day | 299.67 ± 106.37 | 2.50 ± 4.98 | 9.19 |
| total_calling_frequency_night | 299.67 ± 106.37 | 0.35 ± 0.45 | 9.19 |
| total_duration_calls_day | 299.67 ± 106.37 | 332.41 ± 377.24 | 9.19 |
| total_duration_calls_night | 299.67 ± 106.37 | 93.24 ± 168.74 | 9.19 |
| HRV_LF_rq1_day | 259.40 ± 105.32 | 3.89e-03 ± 2.13e-03 | 21.39 |
| HRV_LF_rq1_night | 253.00 ± 104.55 | 5.61e-03 ± 2.93e-03 | 23.33 |
| HRV_LFn_rq1_day | 259.40 ± 105.32 | 0.28 ± 0.03 | 21.39 |
| HRV_LFn_rq1_night | 253.00 ± 104.55 | 0.30 ± 0.02 | 23.33 |
| HRV_MadNN_rq1_day | 259.40 ± 105.32 | 183.59 ± 52.38 | 21.39 |
| HRV_MadNN_rq1_night | 253.00 ± 104.55 | 164.38 ± 46.81 | 23.33 |
| HRV_MedianNN_rq1_day | 259.40 ± 105.32 | 738.58 ± 77.41 | 21.39 |
| HRV_MedianNN_rq1_night | 253.00 ± 104.55 | 768.33 ± 90.40 | 23.33 |
| HRV_SD2_rq1_day | 259.40 ± 105.32 | 327.10 ± 108.21 | 21.39 |
| HRV_SD2_rq1_night | 253.00 ± 104.55 | 296.82 ± 93.76 | 23.33 |
| HRV_SDNN_rq1_day | 259.40 ± 105.32 | 289.70 ± 103.71 | 21.39 |
| HRV_SDNN_rq1_night | 253.00 ± 104.55 | 262.07 ± 88.71 | 23.33 |
| HRV_SDRMSSD_rq1_day | 259.40 ± 105.32 | 1.02 ± 0.21 | 21.39 |
| HRV_SDRMSSD_rq1_night | 253.00 ± 104.55 | 1.09 ± 0.31 | 23.33 |
| HRV_SampEn_rq1_day | 259.40 ± 105.32 | 1.31 ± 0.20 | 21.39 |
| HRV_SampEn_rq1_night | 253.00 ± 104.55 | 1.28 ± 0.19 | 23.33 |
| HRV_ULF_rq1_day | 254.13 ± 105.93 | 4.68e-04 ± 1.16e-04 | 22.99 |
| HRV_ULF_rq1_night | 240.33 ± 105.29 | 4.28e-04 ± 1.53e-04 | 27.17 |
| HRV_VHF_rq1_day | 259.40 ± 105.32 | 1.12e-03 ± 1.04e-03 | 21.39 |
| HRV_VHF_rq1_night | 253.00 ± 104.55 | 1.88e-03 ± 1.72e-03 | 23.33 |
| number_used_ibi_datapoints_rq1_day | 259.40 ± 105.32 | 1.25e+04 ± 3.79e+03 | 21.39 |
| number_used_ibi_datapoints_rq1_night | 253.00 ± 104.55 | 1.46e+04 ± 7.59e+03 | 23.33 |
| daily_sleep_duration | 228.07 ± 115.62 | 1.41 ± 1.16 | 30.89 |
| last_night_sleep_duration | 219.27 ± 115.50 | 4.47 ± 1.60 | 33.56 |
| nightly_sleep_duration_00_06 | 201.53 ± 121.34 | 3.32 ± 1.19 | 38.93 |
| nightly_sleep_duration_18_24 | 219.07 ± 114.81 | 1.46 ± 0.67 | 33.62 |
| day_since_start | 330.00 ± 97.11 | 165.06 ± 48.21 | 0 |
| day_of_week | 330.00 ± 97.11 | 3.01 ± 0.02 | 0 |
| month_of_year | 330.00 ± 97.11 | 6.63 ± 0.25 | 0 |
